# Supplementary material
Source: publisher site journal article supplement (https://www.dovepress.com/article/402253)
Supplement: Supplementary file 1 [file get_supplementary_file.php]

**
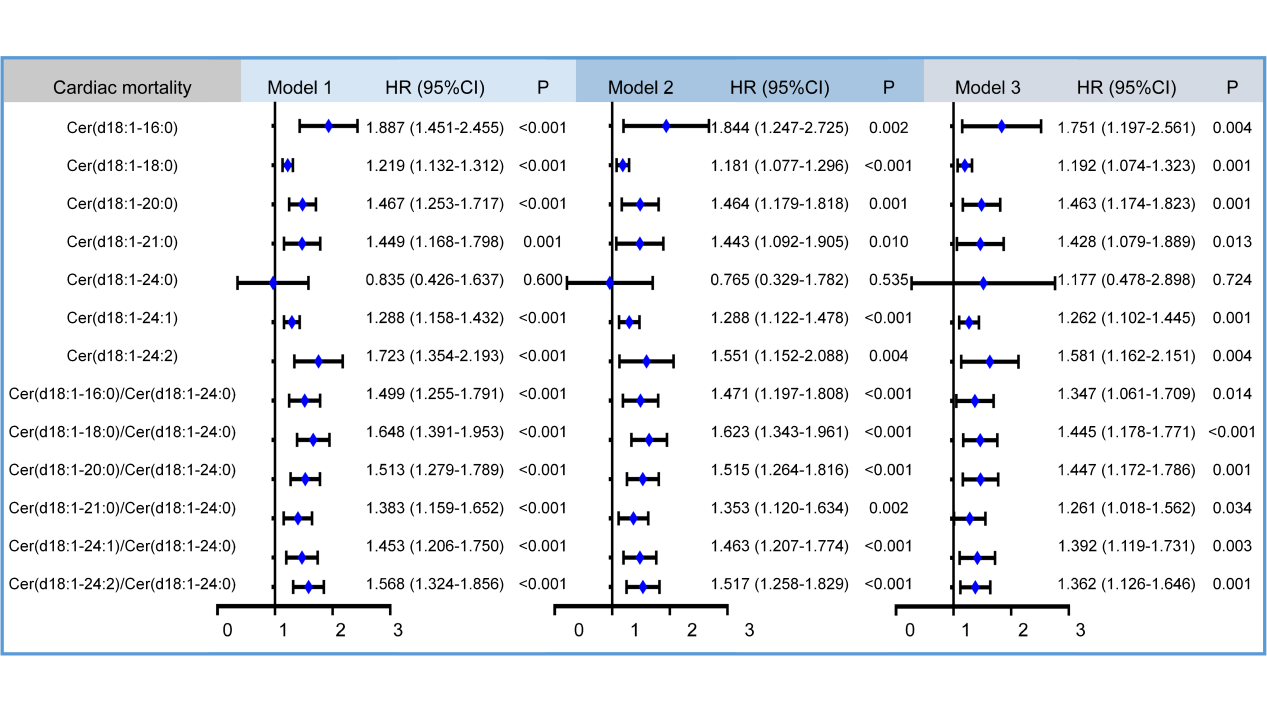
**

**Supplementary Figure Legend**

**Supplementary Figure S1**. Forest plot of hazard ratio of cardiac mortality and Ceramides.

Model 1: adjusted by age, sex, admission systolic blood pressure, smoking, drinking, body mass index, hypertension, diabetes.

Model 2: adjusted by model 1 plus total cholesterol, triglyceride, high density lipoprotein cholesterol, low density lipoprotein cholesterol, white blood cell count, creatinine kinase-myocardial band isoenzyme, blood urea nitrogen.

Model 3: adjusted by model 2 plus treatment, Global registry of Acute Coronary Events score and Gensini score.

CI, confidence interval; Cer, ceramide; HR, hazard ratio.
